# Supplementary material
Source: PubMed Central journal article supplement (PMC8300916)
Supplement: NIHMS1646032-supplement-1.pdf [file NIHMS1646032-supplement-1.pdf]

## SUPPLEMENTARY INFORMATION

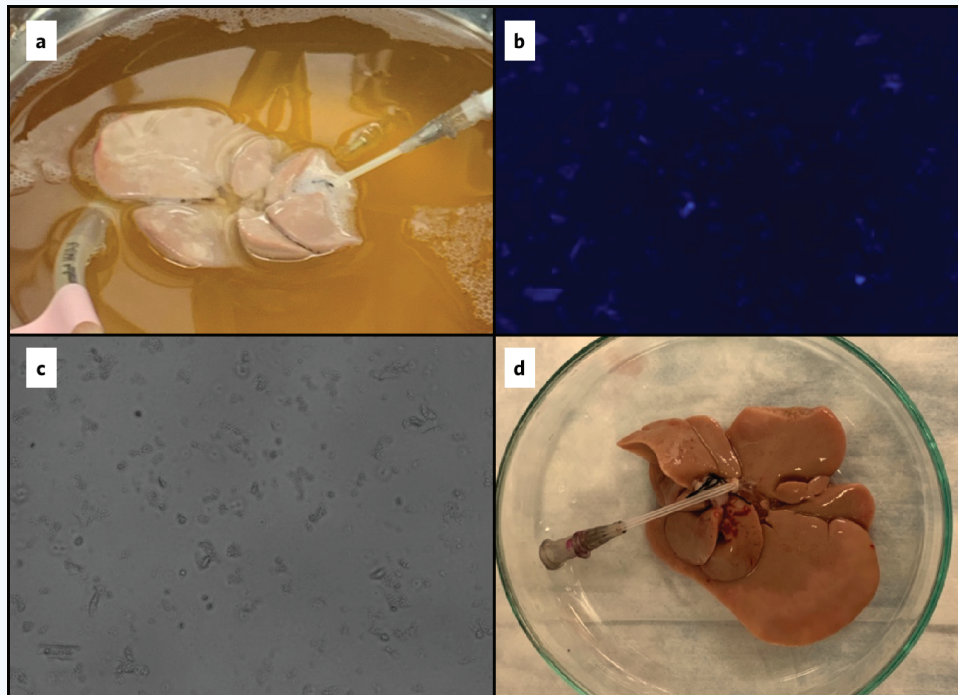

**Supplementary Figure 1** Bacterial contamination of NMP livers. (a) Increased turbidity and color change of contaminated perfusate at 24 hours. (b) Hoechst DNA stain and (c) light microscopy confirmation of bacterial contamination. (d) Uncontaminated liver graft at 24 hours.

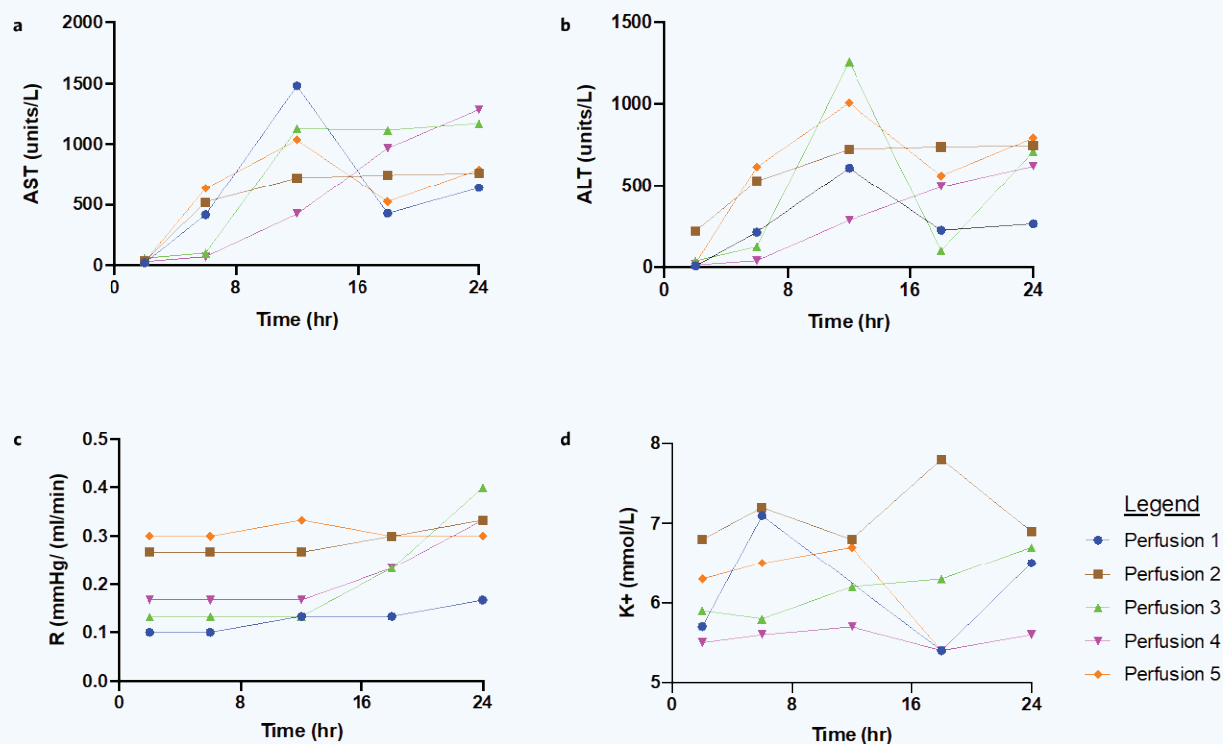

**Supplementary Figure 2** 24-hour rat liver NMP injury indicators of individual, uncontaminated perfusions. (a) AST, (b) ALT, (c) resistance (pressure over flow rate), and (d) potassium.

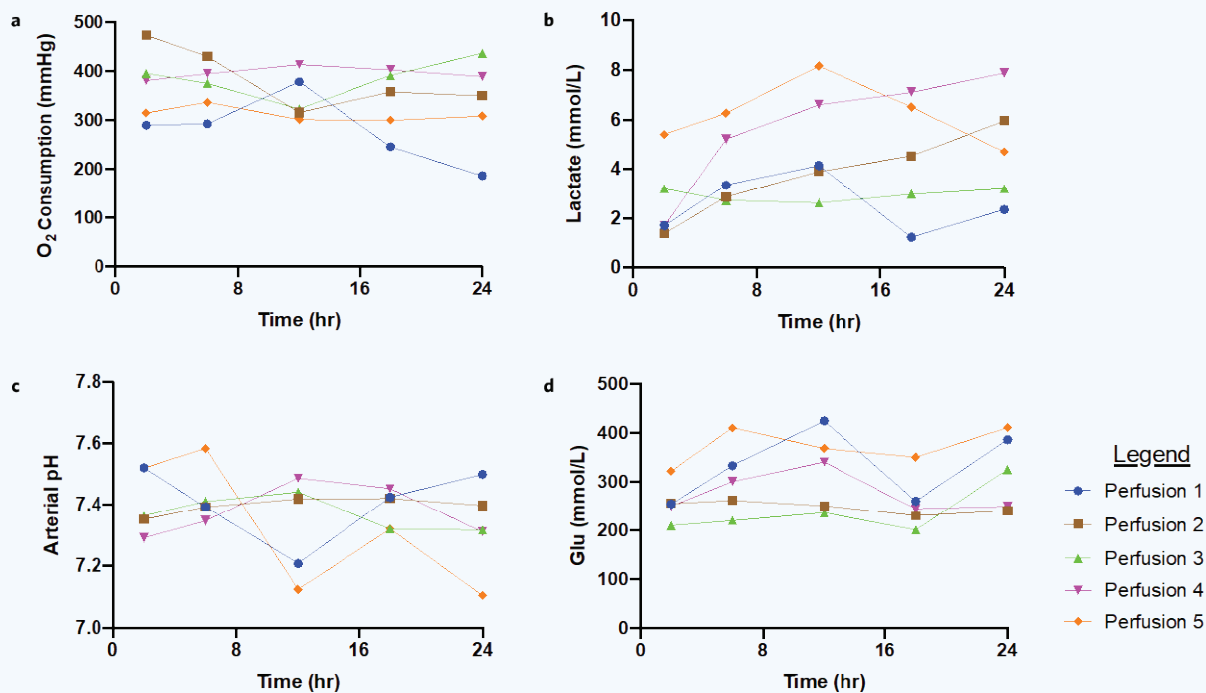

**Supplementary Figure 3** Function during 24-hour rat liver NMP of individual, uncontaminated perfusions. (a) O<sub>2</sub> consumption (inflow pO<sub>2</sub> minus outflow pO<sub>2</sub>), (b) arterial (inflow) lactate, (c) arterial (inflow) pH, and (d) glucose.
